# Supplementary material
Source: publisher figshare collection journal article supplement (https://sage.figshare.com/ndownloader/files/21727683)
Supplement: Supplementary file 1 [file 21727683]

## **Supplementary material**

### **Appendix 1: Search Strategy MEDLINE**

1. brain death/
2. (brain adj1 (death or dead)).mp.
3. irreversible coma\*.mp.
4. coma depasse.mp.
5. (neurologic\*adj1(death or dead)).mp.
6. deceased.mp.
7. deceased donor\*.mp.
8. dead donor\*.mp.
9. or/1-8
10. ((cardiac or heart) adj3 (donor\* or donat\*)).mp.
11. donation after card\*death.mp.
12. or/10-11
13. donor management.mp.
14. "tissue and organ harvesting"/or donor selection/
15. organ harvesting.mp.
16. donor pretreatment.mp.
17. organ don\*.mp.
18. exp organ donor/
19. organ recov\*.mp.
20. organ procure\*.mp.
21. (kidney adj1 (donor\* or donat\* or transplant\*)).mp.
22. (liver adj1 (donor\* or donat\* or transplant\*)).mp.
23. (lung adj1 (donor\* or donat\* or transplant\*)).mp.
24. (heart adj1 (donor\* or donat\* or transplant\*)).mp.
25. (pancreas adj1 (donor\* or donat\* or transplant\*)).mp.
26. (small bowel adj1 (donor\* or donat\* or transplant\*)).mp.
27. or/13-26
28. 9 or 12
29. 27 and 28

30. humans/
31. animals/
32. 30 nor (30 and 31)
33. 29 and 32
34. rct.mp.
35. randomi?ed control\*trial\*.mp.
36. random\*allocation\*.mp.
37. random\*experimental trial\*.mp.
38. control\*clinical trial\*.mp.
39. clinical trial/
40. clinical trial\*.mp.
41. experimental trial\*.mp.
42. single-blind method/
43. double-blind procedure/
44. double-blind method.mp.
45. triple-blind method/
46. triple-blind method.mp.
47. prospective study/
48. (prospective cohort adj2stud\*).mp.
49. (prospective observ\* adj2 stud\*).mp.
50. or/34-39
51. 33 and 50
52. the haemodynamic effects of adjunctive hormone therapy in potential heart.m\_titl.
53. 51 or 52
54. steroid pretreatment of organ donors to prevent postischemic.m\_titl.
55. 51 or 54

### Characteristics of Studies with Waived Research Consent

| Study (year) [country]  | No. sites (N)      | Children included? | Intervention           | Outcomes*      | Donor consent model | Recipient consent model | Justification for waiver of consent for donors                                                                                                                                                         |
|-------------------------|--------------------|--------------------|------------------------|----------------|---------------------|-------------------------|--------------------------------------------------------------------------------------------------------------------------------------------------------------------------------------------------------|
| Chen (2016) [USA]       | Multicentre (85)   | Yes                | Data collection        | Physiological  | Waived              | Not applicable          | « This study was reviewed by our institution's Institution Review Board where it was determined that formal approval was not required as the research did not involve living subjects »                |
| Mancia (2015) [France]  | Single (23)        | No                 | Fibroscan              | Laboratory     | Waived              | Not applicable          | Not reported                                                                                                                                                                                           |
| Bloom (2015) [USA]      | Multicentre (961)  | No                 | Data collection        | Liver recovery | Waived              | Waived                  | « The study was determined to represent nonhuman subject research by our IRB and was approved by the research oversight bodies of each OPO in Region 5. »                                              |
| De la Cruz (2015) [USA] | Multicentre (1066) | No                 | Data collection        | No outcome     | Waived              | Waived                  | « The study was determined to represent nonhuman subject research by our institutional review board and was approved by the research oversight bodies of each OPO in Region 5. »                       |
| Muller (2015) [France]  | Multicentre (146)  | No                 | NGAL serum measurement | Laboratory     | Waived              | Not reported            | « Considering that the current study was noninterventional and that such investigation did not need significant additional blood sample (volume <0.5 ml), the institutional review board approved this |

|                         |                   |    |                                           |               |        |              |                                                                                                                                                                                                                                                                                                                                                                                                                                                                                                                                                                                                                                                                                                                                                                                                                                                                                                                      |
|-------------------------|-------------------|----|-------------------------------------------|---------------|--------|--------------|----------------------------------------------------------------------------------------------------------------------------------------------------------------------------------------------------------------------------------------------------------------------------------------------------------------------------------------------------------------------------------------------------------------------------------------------------------------------------------------------------------------------------------------------------------------------------------------------------------------------------------------------------------------------------------------------------------------------------------------------------------------------------------------------------------------------------------------------------------------------------------------------------------------------|
|                         |                   |    |                                           |               |        |              | <p>study (Institutional Review Board, Nîmes University Hospital, France, file number 2011.01.01) and stated that informed consent of next-of-kin was not required as organ donors are not considered human subjects. However, the next-of-kin was systematically orally informed and could refuse the participation. According to the French law, the National Committee on Health Research Data Analysis (CCTIRS, Comité Consultatif sur le Traitement de l'Information en matière de Recherche dans le domaine de la Santé , Nîmes France, file number: 11.140) and the National »</p> <p>« Committee on Information Technology (Commission Nationale de l'Informatique et des Libertés , Paris, France, file number EGY/FLR/AR114292) also approved this study. This prospective, multicenter, observational study was conducted by a French anesthesia and intensive care research network (AzuRea group). »</p> |
| Zarrinpar (2015) [USA]  | Multicentre (53)  | No | Non-invasive measurement of ICG clearance | Laboratory    | Waived | Not reported | Not reported                                                                                                                                                                                                                                                                                                                                                                                                                                                                                                                                                                                                                                                                                                                                                                                                                                                                                                         |
| Pinsard (2014) [France] | Multicentre (259) | No | Steroid                                   | Physiological | Waived | Waived       | « The study was approved by the French human subject protection committee, which waived the need for written informed consent from the family. In fact, French law entitles the conduct of randomized                                                                                                                                                                                                                                                                                                                                                                                                                                                                                                                                                                                                                                                                                                                |

|                               |                    |    |                              |                  |        |                |                                                                                                                                                                                                                                                                                                                                                                       |
|-------------------------------|--------------------|----|------------------------------|------------------|--------|----------------|-----------------------------------------------------------------------------------------------------------------------------------------------------------------------------------------------------------------------------------------------------------------------------------------------------------------------------------------------------------------------|
|                               |                    |    |                              |                  |        |                | studies among clinically deceased patients without any informed consent from the family of the patient concerned. The families of the donors were informed of the study. The French Registre National des Refus was consulted systematically (mandatory in France) to eliminate any opposition of the donor to participation in a clinical trial or organ donation. » |
| Sally (2014) [USA]            | Multicentre (1611) | No | Data collection              | Organs recovered | Waived | Waived         | Not reported                                                                                                                                                                                                                                                                                                                                                          |
| Malinoski (2013) [USA]        | Multicentre (492)  | No | Data collection              | Organs recovered | Waived | Waived         | Non human subject<br>“this study was approved internally by the research oversight bodies of each OPO and was determined to represent non-human subjects research by the Cedars-Sinai Medical Center IRB”                                                                                                                                                             |
| Hollmen (2011) [Finland]      | Single (99)        | No | Data collection              | Laboratory       | Waived | Informed       | Not reported                                                                                                                                                                                                                                                                                                                                                          |
| Christmas (2010) [USA]        | Multicentre (100)  | No | Data collection              | Organs recovered | Waived | Not applicable | Not reported                                                                                                                                                                                                                                                                                                                                                          |
| Eyraud (2008) [France]        | Single (67)        | No | Blood sample                 | No donor outcome | Waived | Waived         | “The ethical committee waived the need for informed consent because alicots were taken from routine samples”                                                                                                                                                                                                                                                          |
| Nicolas-Robin (2007) [France] | Single (63)        | No | Blood sample (BNP, Troponin) | Physiological    | Waived | Not applicable | “The need for informed consent was waived since biological analysis was performed on blood withdrawn during routine biological testing for cTnI and                                                                                                                                                                                                                   |

|                                     |                   |     |                              |                   |        |                |                                                                                                                                                                                                                                                                                                                                                                                                                                                                        |
|-------------------------------------|-------------------|-----|------------------------------|-------------------|--------|----------------|------------------------------------------------------------------------------------------------------------------------------------------------------------------------------------------------------------------------------------------------------------------------------------------------------------------------------------------------------------------------------------------------------------------------------------------------------------------------|
|                                     |                   |     |                              |                   |        |                | transesophageal echocardiography is routinely performed in our unit for the assessment of brain death patients. This study was accomplished in accordance with the French laws concerning multiple organs procurement."                                                                                                                                                                                                                                                |
| Fischer (2003) [UK]                 | Multicentre (26)  | No  | Bronchoscopy+ Lung biopsy    | Laboratory        | Waived | Not reported   | Not reported                                                                                                                                                                                                                                                                                                                                                                                                                                                           |
| Riou (1995) [France]                | Single (80)       | Yes | Blood sample (troponin)      | Physiological     | Waived | Not applicable | Not reported                                                                                                                                                                                                                                                                                                                                                                                                                                                           |
| Riou (1994) [France]                | Single (72)       | No  | Bronchoscopy                 | Process of care   | Waived | Not applicable | Not reported                                                                                                                                                                                                                                                                                                                                                                                                                                                           |
| <b>Randomized controlled trials</b> |                   |     |                              |                   |        |                |                                                                                                                                                                                                                                                                                                                                                                                                                                                                        |
| Niemann (2015) [USA]                | Multicentre (394) | No  | Temp 34-35 Vs Temp 36.5-37.5 | No donors outcome | Waived | Waived         | « The study was evaluated by the institutional review board at the University of California, San Francisco, and was deemed to represent nonhuman subjects research under U.S. federal law, since the patients were deceased. Furthermore, the institutional review board concluded that this study posed minimal risks to the organ recipients and that informed consent would not be required for a recipient to accept an organ from a donor enrolled in the study » |
| Amatschek (2012) [Austria]          | Multicentre (90)  | No  | Steroids vs no steroids      | No donor outcome  | Waived | Waived         | Not reported                                                                                                                                                                                                                                                                                                                                                                                                                                                           |
| Minou (2012)                        | Single (60)       | No  | Sevoflurane vs               | No donor outcome  | Waived | Informed       | Not reported                                                                                                                                                                                                                                                                                                                                                                                                                                                           |

|                           |                |    |                                                   |               |        |          |                                                                                                                                                                                                                                                                                                                                                                                                                                                                  |
|---------------------------|----------------|----|---------------------------------------------------|---------------|--------|----------|------------------------------------------------------------------------------------------------------------------------------------------------------------------------------------------------------------------------------------------------------------------------------------------------------------------------------------------------------------------------------------------------------------------------------------------------------------------|
| [Belarus]                 |                |    | Placebo                                           |               |        |          |                                                                                                                                                                                                                                                                                                                                                                                                                                                                  |
| Koneru<br>(2005)<br>[USA] | Single<br>(62) | No | Ischemic<br>preconditi<br>oning<br>Vs<br>Standard | Physiological | Waived | Informed | The human research committee of our institution and the organ recovery network's physician committee approved the conduct of the study with a requirement to review the data on a periodic basis for any trends of potential harm to the recipients. Informed consent was obtained from the prospective liver recipients. An exemption from consent by the donor's next of kin, apart from that for organ donation, was granted by the human research committee. |

\*Outcomes: I suggest that you just state the type of outcomes as follows:
